# Supplementary material for: miR-424-5p Promotes Anoikis Resistance and Lung Metastasis by Inactivating Hippo Signaling in Thyroid Cancer
Source: PubMed Central journal article supplement — Mol Ther Oncolytics. 2019 Nov 13;15:248–60. doi: 10.1016/j.omto.2019.10.008 (PMC6921161; doi:10.1016/j.omto.2019.10.008), 2019-11-13
Supplement: mmc1.pdf [file mmc1.pdf]

**OMTO, Volume 15**

**Supplemental Information**

**miR-424-5p Promotes Anoikis Resistance  
and Lung Metastasis by Inactivating  
Hippo Signaling in Thyroid Cancer**

**Xiaoli Liu, Yantao Fu, Guang Zhang, Daqi Zhang, Nan Liang, Fang Li, Changlin Li, Chengqiu Sui, Jinxi Jiang, Hongzhi Lu, Zihan Zhao, Gianlorenzo Dionigi, and Hui Sun**

## Supplemental Figure 1

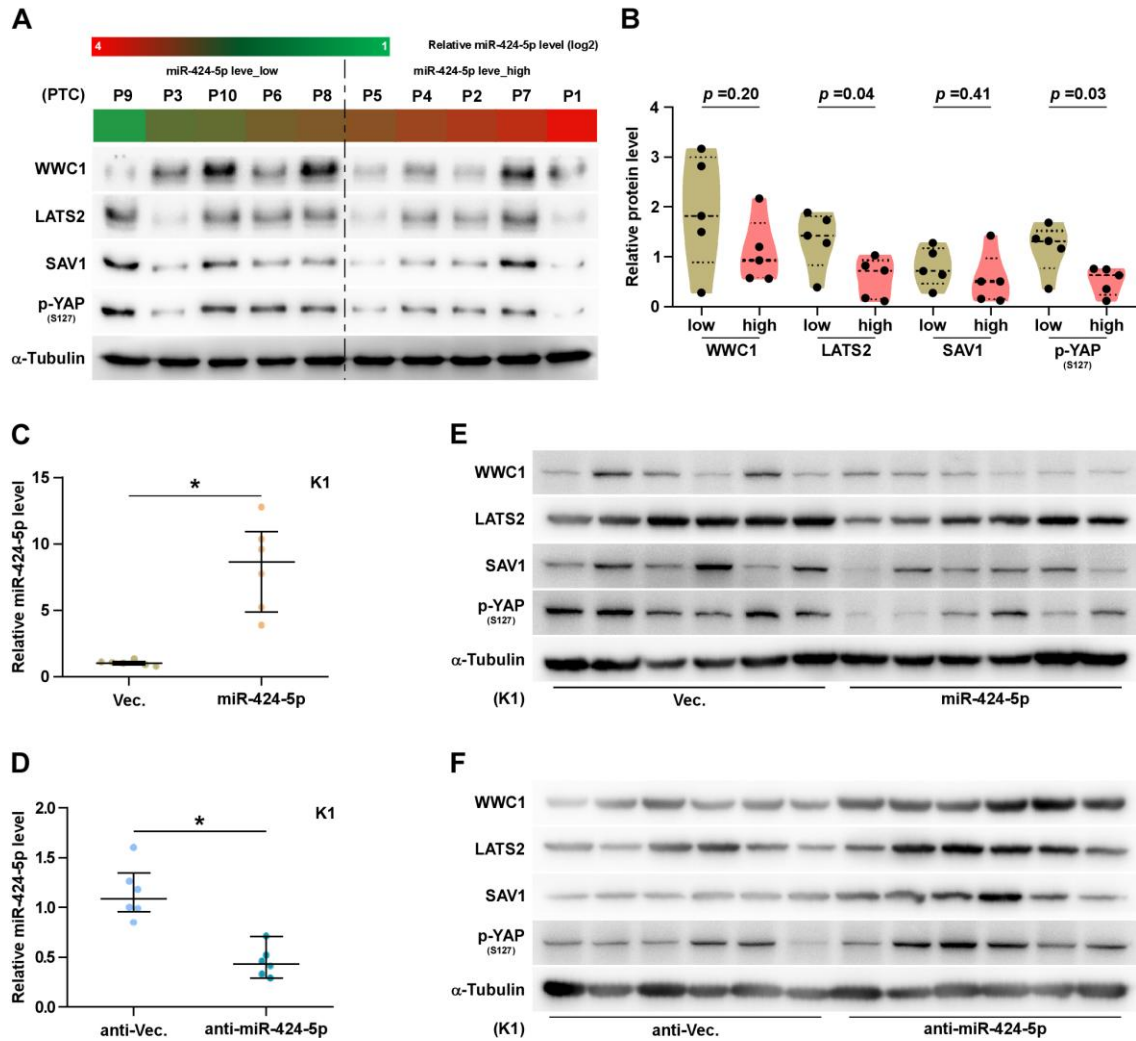

**Supplemental Figure 1. miR-424-5p negatively correlates with WWC1, SAV1 and LAST2, and YAP1.** (A and B) Analysis of miR-424-5p expression with WWC1, SAV1 and LAST2, and YAP1 in 10 paired thyroid cancer tissues. U6 was used as the control for miRNA loading. miR-424-5p expression levels were normalized to that miR-424-5p expression of case 1. Each bar represents the mean  $\pm$ SD of three independent experiments.  $\alpha$ -tubulin was used as a loading control. (C-F) miR-424-5p, WWC1, SAV1 and LAST2, and YAP1 expression in the tumor tissues of the mice inoculated with the indicated thyroid cancer cells. U6 was used as the control for miRNA loading. miR-424-5p expression levels were normalized to that miR-424-5p expression in vector group. Each bar represents the mean  $\pm$ SD of three independent experiments.  $\alpha$ -tubulin and p84 were used as total and nuclear loading controls, respectively.

**Supplemental Table 1. The basic information of 10 thyroid carcinoma patients for miR-424-5p RNA expression analysis.**

|                  |        | Cases (n) | Percentage (%) |
|------------------|--------|-----------|----------------|
| Histologic       | PTC    | 10        | 100.0          |
|                  | ATC    | 0         | 0.0            |
| Gender           | Male   | 0         | 0.0            |
|                  | Female | 10        | 100.0          |
| Age              | <45    | 7         | 70.0           |
|                  | ≥45    | 3         | 30.0           |
| T classification | T1     | 5         | 50.0           |
|                  | T2     | 4         | 40.0           |
|                  | T3     | 0         | 0.0            |
|                  | T4     | 1         | 10.0           |
| N classification | N0     | 2         | 20.0           |
|                  | N1     | 8         | 80.0           |
| M classification | M0     | 10        | 100.0          |
|                  | M1     | 0         | 0.0            |
| Stage            | I      | 10        | 100.0          |
|                  | II     | 0         | 0.0            |
|                  | III    | 0         | 0.0            |
|                  | IV     | 0         | 0.0            |

\* PTC: papillary thyroid carcinoma; ATC: anaplastic thyroid carcinoma.

**Supplemental Table 2. A list of primers used in the reactions for real-time RT-PCR.**

| Gene      | Sequence (5`– 3`)        |
|-----------|--------------------------|
| GAPDH-up  | TCCTCTGACTTCAACAGCGACAC  |
| GAPDH-dn  | CACCCTGTTGCTGTAGCCAAATTC |
| CTGF-up   | TGGAGATTTTGGGAGTACGG     |
| CTGF-dn   | CAGGCTAGAGAAGCAGAGCC     |
| CYR61-up  | GGTCAAAGTTACCGGGCAGT     |
| CYR61-dn  | GGAGGCATCGAATCCCAGC      |
| HOXA1-up  | TCCTGGAATACCCATACTTAGC   |
| HOXA1-dn  | GCACGACTGGAAAGTTGTAATCC  |
| SOX9-up   | AGCGAACGCACATCAAGAC      |
| SOX9-dn   | CTGTAGGCGATCTGTTGGGG     |
| RPL13A-up | GCCATCGTGGCTAACAGGTA     |
| RPL13A-dn | GTTGGTGTTCATCCGCTTGC     |
| PPIA-up   | GGCAAATGCTGGACCCAACACA   |
| PPIA-dn   | TGCTGGTCTTGCCATTCCTGGA   |

**Supplemental Table 3. A list of primers used in the reactions for clone PCR.**

| Gene           | Sequence (5' – 3')          |
|----------------|-----------------------------|
| MIR424-up      | CACCTGCAGCTCCTGGAAATC       |
| MIR424-dn      | CCCAGCCTAGCCAGGAATACT       |
| LATS2-3'UTR-up | GACTCAGCATCGCTTTCAATAGGC    |
| LATS2-3'UTR-dn | CACCAGACGTCGGAAATCACAG      |
| SAV1-3'UTR-up  | AGCAGTGGTATGCCCAACAAC       |
| SAV1-3'UTR-dn  | TCTG TTCATAATGACATTTCCGCTGC |
| WWC1-3'UTR-up  | CAAGTCCTCTAGTGCTCTTGTTGG    |
| WWC1-3'UTR-dn  | TAGCTGTACTGTGACAAGTGCGG     |
